# Supplementary material
Source: ML conference proceedings conference paper supplement (https://openaccess.thecvf.com/content/ICCV2025/html/Guo_SCAN_Bootstrapping_Contrastive_ICCV_2025_paper.html)
Supplement: Supplementary file 1 [file Guo_SCAN_Bootstrapping_Contrastive_ICCV_2025_supplemental.pdf]

# SCAN: Bootstrapping Contrastive Pre-training for Data Efficiency – Supplementary Material

Yangyang Guo, Mohan Kankanhalli  
National University of Singapore, Singapore  
guoyang.eric@gmail.com, mohan@comp.nus.edu.sg

## Abstract

*This supplementary material is structured as follows. First, we present the detailed algorithm of the proposed method. Next, we describe the baseline methods used for comparison. Finally, we provide an in-depth analysis of additional experiments.*

## 1. SCAN Algorithm

We present a detailed algorithm of our proposed SCAN in Algorithm 1. This algorithm is applicable to contrastive pre-training models including CLIP and MoCo.

## 2. More Experimental Settings

### 2.1. Pre-Training Details

Our primary objective in this study is to assess the efficacy of our proposed data-efficient method. Consequently, we did not conduct an extensive parameter search and instead utilized a universal setting across different models.

Due to limitations in computational resources, most of our pre-training experiments were conducted using four NVIDIA A5000 GPUs. Specifically, for CLIP models, we employed 32 epochs, a learning rate of  $1e-3$ , and a weight decay of 0.1. Various batch sizes are detailed in Table 1. For the downstream image classification task, we fine-tuned the pre-trained models on a single NVIDIA A100-40G GPU. Fine-tuning comprises 10 epochs with a learning rate of  $1e-3$  and a weight decay of 0.1.

Regarding the pre-training of MoCo, we utilized the original implementation<sup>1</sup>. We employed batch sizes of 600 and 370 for ViT-16/S and ViT-B/16, respectively.

### 2.2. Compared Baselines

We compared with the following four baselines in this work:

- **Random** prunes  $\rho$  samples with randomness for each epoch. Notably, it falls under dynamic pruning methods as the pruned samples vary across epochs.
- **SemDeDup** [1] identifies the semantic duplicates based on embedding similarities. We used one public implementation<sup>2</sup>. This method is applicable only to multi-modal models such as CLIP.
- **D-Pruning** [3] estimate the parameter influence of a training example through the removal of it. We utilized the official implementation<sup>3</sup> for CLIP models only. We abandoned the use of MoCo due to its hard-to-configure running environment.
- **Info-Batch** [2] is a recent robust dataset pruning baseline. It prunes a portion of less informative samples and then rescales the gradients of the remaining samples to approximate the original gradients. We followed the original code<sup>4</sup> to re-implement it for our experiments.

## 3. More Experimental Results

We present additional fine-tuning results of CLIP in Table 3 and Table 4. Furthermore, Table 5 shows the results of linear probing for CLIP. It is evident that our proposed SCAN method consistently achieves superior performance across various settings.

**Experimental Results on CLIP-Benchmark.** We utilized the CLIP-Benchmark tool to assess the performance of both CLIP and our SCAN method across 19 additional datasets. For this evaluation, we employed models pre-trained on the CC12M+ datasets. The results, presented in Table 6, demonstrate that our SCAN method delivers performance competitive with the original CLIP.

**Results w.r.t. Pre-defined Thresholds.** To assess the impact of varying thresholds, we evaluated two model architectures, RN50 and ViT-B/32, using threshold values from 0.1 to 0.7, with a step size of 0.2. The ImageNet zero-shot

<sup>1</sup><https://github.com/facebookresearch/moco-v3>.

<sup>2</sup><https://github.com/BAAI-DCAI/Dataset-Pruning/tree/main>.

<sup>3</sup><https://github.com/BAAI-DCAI/Dataset-Pruning/tree/main>.

<sup>4</sup><https://github.com/henryqin1997/InfoBatch>.

---

**Algorithm 1:** Dataset Pruning of SCAN.

---

**Input:** Full training data  $\mathcal{D}$ , Number of training epochs  $\tau_{stop}$ , Number of mutation epochs  $\tau_{cos}$ , Pre-initialized losses  $\hat{\mathcal{L}}_{pre}$  and  $\hat{\mathcal{L}}_{cur}$ , Threshold value  $T_{td}$  and an infinitesimal value  $\epsilon$ .

**Output:** Pre-trained model  $\mathcal{M}$

```
while  $\tau_{cur} < \tau_{stop}$  do
  // Pre-Pruning Warm-Up
  if  $(\hat{\mathcal{L}}_{pre} - \hat{\mathcal{L}}_{cur}) / (\hat{\mathcal{L}}_{pre} + \epsilon) \geq T_{td}$  then
    for Batched sample  $\mathcal{D}_t \in \mathcal{D}$  do
      | Forward and update  $\mathcal{M}$  on  $\mathcal{D}_t$ ;
    end
     $\hat{\mathcal{L}}_{pre} \leftarrow \hat{\mathcal{L}}_{cur}$ ;
    Get the updated current epoch loss  $\hat{\mathcal{L}}_{cur}$ ;
  end
  else
    // Pruning Data Preparation
    if  $\tau_{cur} \bmod (\tau_{cos} + 1) = 0$  then
      for Batched sample  $\mathcal{D}_t \in \mathcal{D}$  do
        | Forward and update  $\mathcal{M}$  on  $\mathcal{D}_t$ ;
        | Obtain redundant set  $\mathcal{D}_t^{red}$  and
          | ill-matched set  $\mathcal{D}_t^{ill}$ ;
        | Obtain the overall pruning subset
          |  $\mathcal{D}'_t = \mathcal{D}_t^{red} \cup \mathcal{D}_t^{ill}$ ;
        end
        Accumulate all the candidate pruning
        data  $\mathcal{D}'$ ;
      end
      // Dataset Mutation
      else
        Obtain the pruning ratio  $\rho_{cur}$ ;
        Randomly prune  $\rho_{cur}|\mathcal{D}'|$  samples from
         $\mathcal{D}'$ ;
        for Batched sample  $\mathcal{D}_t \in \mathcal{D} \setminus \mathcal{D}'_t$  do
          | Forward and update  $\mathcal{M}$  on  $\mathcal{D}_t$ 
        end
      end
    end
  end
   $\tau_{cur} \leftarrow \tau_{cur} + 1$ 
end
```

---

We further visualize some ill-matched samples as indicated by SCAN in Fig. 2.

## References

- [1] Amro Abbas, Kushal Tirumala, Daniel Simig, Surya Ganguli, and Ari S. Morcos. Semdedup: Data-efficient learning at web-scale through semantic deduplication. *CoRR*, 2023. 2, 4, 5, 6
- [2] Ziheng Qin, Kai Wang, Zangwei Zheng, Jianyang Gu, Xiangyu Peng, Daquan Zhou, and Yang You. Infobatch: Lossless training speed up by unbiased dynamic data pruning. In *ICLR*, 2024. 2, 4, 5, 6
- [3] Shuo Yang, Zeke Xie, Hanyu Peng, Min Xu, Mingming Sun, and Ping Li. Dataset pruning: Reducing training data by examining generalization influence. In *ICLR*, 2023. 2, 4, 5, 6

performance results are summarized in the table below. As indicated, the models perform optimally at threshold values of 0.3 or 0.5. For simplicity and consistency, we selected a threshold of 0.3 for subsequent model evaluations.

**Different Pruning Ratios of MoCo.** The performance variations with different pruning ratios ( $\rho$ ) for the MoCo model are depicted in Fig. 1. It is evident that as the pruning ratios increase, there is a general degradation in performance.

**More Visualization of Ill-matched Samples from CLIP.**

Table 1. Batch sizes for pre-training and fine-tuning CLIP models.

| PT | RN50  | RN101 | ViT-S/32 | ViT-S/16 | ViT-B/32 | ViT-B/16 | Swin-Base |
|----|-------|-------|----------|----------|----------|----------|-----------|
| ✓  | 256×4 | 200×4 | 800×4    | 400×4    | 480×4    | 200×4    | 100×4     |
| ✗  | 384   | 225   | 1024     | 600      | 768      | 300      | 160       |

| Base       | ViT-B/16 | RN101 | RN50 | ViT-S/16 | ViT-B/32 | ViT-S/32 |
|------------|----------|-------|------|----------|----------|----------|
| CLIP       | 87       | 79    | 60   | 49       | 37       | 32       |
| Static     | 61       | 55    | 42   | 34       | 26       | 23       |
| Info-Batch | 64       | 60    | 44   | 34       | 28       | 25       |
| SCAN       | 64       | 62    | 45   | 34       | 30       | 26       |

Table 2. Pre-training time in hours.

Table 3. Performance comparison of CLIP models on the **CC3M+** pre-trained datasets. All methods utilize **30% fewer pre-trained data samples** than CLIP. Consequently, they also require approximately **30% less pre-training time**. The best results (excluding the original CLIP model) are highlighted in **bold**.

| Architecture | Method         | IN Zero-Shot |              | CIFAR10      | CIFAR100     | IN           | IN-V2        | IN-R         |
|--------------|----------------|--------------|--------------|--------------|--------------|--------------|--------------|--------------|
|              |                | Top-1        | Top-5        |              |              |              |              |              |
| RN50         | CLIP           | 17.06        | 36.21        | 95.32        | 80.01        | 73.81        | 61.89        | 36.09        |
|              | Random         | 11.02        | 25.23        | 94.01        | 75.12        | 70.22        | 58.04        | 31.80        |
|              | SemDeDup [1]   | 11.98        | 26.30        | 94.53        | 76.81        | 71.51        | 58.79        | 32.31        |
|              | D-Pruning [3]  | 11.72        | 26.65        | 94.48        | 76.73        | 71.11        | 58.79        | 31.88        |
|              | Info-Batch [2] | 16.44        | <b>36.74</b> | 95.30        | 79.40        | <b>73.01</b> | <b>61.49</b> | <b>35.04</b> |
|              | SCAN           | <b>16.91</b> | 35.79        | <b>95.30</b> | <b>80.24</b> | 72.91        | 60.59        | 34.53        |
| ViT-S/32     | CLIP           | 13.70        | 29.33        | 90.59        | 71.74        | 55.60        | 42.81        | 23.91        |
|              | Random         | 06.57        | 16.19        | 86.61        | 60.18        | 48.87        | 34.48        | 17.98        |
|              | SemDeDup [1]   | 05.33        | 14.05        | 85.16        | 59.87        | 47.39        | 35.56        | 17.70        |
|              | D-Pruning [3]  | 04.78        | 12.91        | 84.21        | 57.96        | 46.53        | 34.77        | 16.88        |
|              | Info-Batch [2] | 10.89        | 26.91        | 90.02        | 69.99        | 50.53        | 39.61        | 19.69        |
|              | SCAN           | <b>14.88</b> | <b>31.47</b> | <b>90.12</b> | <b>70.33</b> | <b>54.13</b> | <b>41.29</b> | <b>22.70</b> |
| ViT-S/16     | CLIP           | 18.41        | 37.41        | 96.09        | 81.31        | 68.49        | 55.79        | 29.52        |
|              | Random         | 07.80        | 21.53        | 93.58        | 72.11        | 62.13        | 49.63        | 19.01        |
|              | SemDeDup [1]   | 09.57        | 22.00        | 93.43        | 74.37        | 62.30        | 48.89        | 23.04        |
|              | D-Pruning [3]  | 08.60        | 20.35        | 93.26        | 73.72        | 61.70        | 48.97        | 22.46        |
|              | Info-Batch [2] | 16.19        | 35.06        | <b>95.64</b> | 80.03        | 67.57        | 53.52        | <b>27.64</b> |
|              | SCAN           | <b>17.31</b> | <b>35.51</b> | 95.53        | <b>80.27</b> | <b>66.86</b> | <b>53.59</b> | 27.34        |
| ViT-B/32     | CLIP           | 14.97        | 32.02        | 94.43        | 77.72        | 58.33        | 45.70        | 25.59        |
|              | Random         | 07.44        | 18.88        | 89.96        | 69.41        | 50.43        | 40.62        | 18.07        |
|              | SemDeDup [1]   | 07.20        | 17.50        | 90.88        | 70.13        | 50.99        | 38.34        | 19.76        |
|              | D-Pruning [3]  | 06.51        | 16.13        | 60.07        | 69.11        | 50.01        | 38.43        | 19.03        |
|              | Info-Batch [2] | 12.44        | 30.98        | 93.57        | 75.44        | 55.99        | 43.30        | <b>24.64</b> |
|              | SCAN           | <b>16.48</b> | <b>33.60</b> | <b>93.77</b> | <b>77.63</b> | <b>56.64</b> | <b>44.25</b> | 24.10        |

Table 4. Performance comparison of CLIP models on the **CC12M+** pre-trained datasets. All methods utilize **30% fewer pre-trained data samples** than CLIP. Consequently, they also require approximately **30% less pre-training time**. The best results (excluding the original CLIP model) are highlighted in **bold**.

| Architecture | Method         | IN Zero-Shot |              | CIFAR10      | CIFAR100     | IN           | IN-V2        | IN-R         |
|--------------|----------------|--------------|--------------|--------------|--------------|--------------|--------------|--------------|
|              |                | Top-1        | Top-5        |              |              |              |              |              |
| RN50         | CLIP           | 20.95        | 44.41        | 95.68        | 80.75        | 74.93        | 62.81        | 38.36        |
|              | Random         | 12.39        | 35.96        | 94.89        | 76.96        | 71.65        | 59.71        | 32.03        |
|              | SemDeDup [1]   | 15.89        | 36.76        | 95.00        | 78.12        | 72.46        | 60.01        | 33.86        |
|              | D-Pruning [3]  | 11.19        | 26.53        | 94.31        | 77.69        | 71.96        | 59.19        | 33.44        |
|              | Info-Batch [2] | 20.63        | 45.10        | <b>95.68</b> | 79.88        | 73.53        | 61.23        | 36.67        |
|              | SCAN           | <b>23.03</b> | <b>47.83</b> | 95.63        | <b>81.03</b> | <b>74.28</b> | <b>62.20</b> | <b>38.14</b> |
| ViT-S/32     | CLIP           | 26.48        | 51.32        | 93.23        | 76.32        | 61.53        | 48.60        | 30.57        |
|              | Random         | 08.79        | 16.93        | 87.79        | 63.04        | 50.12        | 38.09        | 21.11        |
|              | SemDeDup [1]   | 05.04        | 13.49        | 86.43        | 61.67        | 49.46        | 37.37        | 19.29        |
|              | D-Pruning [3]  | 04.54        | 12.43        | 85.86        | 61.81        | 48.39        | 36.57        | 18.62        |
|              | Info-Batch [2] | 10.07        | 26.63        | 91.11        | 67.94        | 53.47        | 40.91        | 20.77        |
|              | SCAN           | <b>25.27</b> | <b>50.08</b> | <b>91.86</b> | <b>75.27</b> | <b>59.87</b> | <b>46.96</b> | <b>27.86</b> |
| ViT-S/16     | CLIP           | 27.09        | 53.57        | 96.62        | 84.05        | 71.40        | 58.40        | 34.24        |
|              | Random         | 16.58        | 35.43        | 95.00        | 79.90        | 67.78        | 54.12        | 26.23        |
|              | SemDeDup [1]   | 10.56        | 26.52        | 94.46        | 76.65        | 65.32        | 51.37        | 25.52        |
|              | D-Pruning [3]  | 09.37        | 22.16        | 93.42        | 75.52        | 63.53        | 50.79        | 24.43        |
|              | Info-Batch [2] | 21.28        | 45.56        | 96.09        | 82.13        | 68.87        | 55.90        | 29.58        |
|              | SCAN           | <b>28.46</b> | <b>54.56</b> | <b>96.24</b> | <b>83.32</b> | <b>70.40</b> | <b>57.10</b> | <b>31.85</b> |

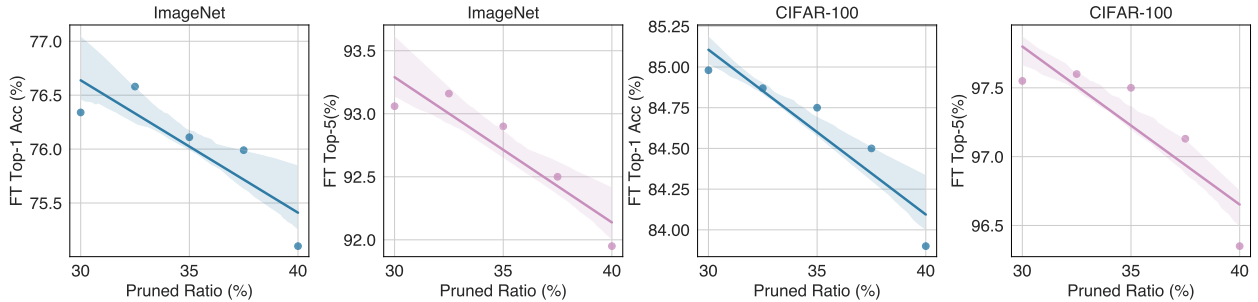

Figure 1. Downstream performance variation of ViT-S/16 MoCo model *w.r.t.* different pruning ratios.

Table 5. Linear probing results of six CLIP models. All methods utilize **30% fewer pre-trained data samples** than CLIP. Consequently, they also require approximately **30% less pre-training time**. The best results (excluding the original CLIP model) are highlighted in **bold**. A dash (-) indicates the collapse of pre-training, resulting in impaired evaluation of downstream tasks.

| Arc      | Method         | CC3M+        |              |              |              |              | CC12M+       |              |              |              |              |
|----------|----------------|--------------|--------------|--------------|--------------|--------------|--------------|--------------|--------------|--------------|--------------|
|          |                | CF-10        | CF-100       | IN           | IN-V2        | IN-R         | CF-10        | CF-100       | IN           | IN-V2        | IN-R         |
| RN50     | CLIP           | 95.58        | 80.31        | 73.96        | 61.60        | 35.59        | 95.69        | 81.88        | 74.96        | 62.85        | 38.57        |
|          | Random         | 93.89        | 75.45        | 70.25        | 58.05        | 31.78        | 94.00        | 76.43        | 70.99        | 58.78        | 32.09        |
|          | SemDeDup [1]   | 94.92        | 77.16        | 71.62        | 58.99        | 32.44        | 94.88        | 78.00        | 72.22        | 59.70        | 33.16        |
|          | D-Pruning [3]  | 94.50        | 76.78        | 71.00        | 57.98        | 31.70        | 94.30        | 77.70        | 71.77        | 59.01        | 33.20        |
|          | Info-Batch [2] | 95.29        | 79.39        | 73.07        | 61.03        | <b>34.66</b> | <b>95.66</b> | 79.84        | 73.23        | 61.10        | 36.63        |
|          | SCAN           | <b>95.46</b> | <b>80.35</b> | <b>73.07</b> | <b>61.25</b> | 34.59        | 95.62        | <b>81.28</b> | <b>74.27</b> | <b>62.66</b> | <b>37.30</b> |
| RN101    | CLIP           | 95.92        | 82.04        | 75.10        | 63.61        | 38.78        | 96.03        | 82.73        | 75.78        | 63.93        | 40.09        |
|          | Random         | 95.00        | 78.13        | 73.79        | 60.20        | 36.12        | 95.02        | 78.34        | 73.99        | 60.27        | 36.13        |
|          | SemDeDup [1]   | 94.84        | 79.25        | 74.08        | 61.94        | 36.74        | 95.01        | 78.02        | 73.89        | 59.91        | 33.80        |
|          | D-Pruning [3]  | 94.79        | 72.12        | 73.74        | 61.66        | 35.64        | 94.78        | 78.83        | 74.08        | 61.28        | 37.09        |
|          | Info-Batch [2] | 95.08        | 80.76        | 74.13        | 62.89        | 37.57        | 95.82        | 81.56        | 75.02        | 63.21        | 39.21        |
|          | SCAN           | <b>95.67</b> | <b>81.36</b> | <b>74.42</b> | <b>63.07</b> | <b>37.86</b> | <b>95.93</b> | <b>82.12</b> | <b>75.61</b> | <b>63.87</b> | <b>39.32</b> |
| ViT-S/32 | CLIP           | 91.65        | 72.23        | 55.52        | 43.00        | 23.48        | 93.29        | 77.06        | 61.73        | 48.84        | 30.40        |
|          | Random         | 87.00        | 61.31        | 49.97        | 36.07        | 20.88        | 87.79        | 63.04        | 50.12        | 38.09        | 21.11        |
|          | SemDeDup [1]   | 83.46        | 60.06        | 47.65        | 35.51        | 17.61        | 86.23        | 61.77        | 49.20        | 37.10        | 19.11        |
|          | D-Pruning [3]  | 84.21        | 58.73        | 46.57        | 35.03        | 16.95        | 85.82        | 61.09        | 47.99        | 36.58        | 18.00        |
|          | Info-Batch [2] | 89.30        | 70.02        | 50.51        | 39.58        | 19.78        | 91.02        | 68.90        | 53.49        | 40.69        | 20.71        |
|          | SCAN           | <b>89.37</b> | <b>71.05</b> | <b>54.24</b> | <b>41.30</b> | <b>22.65</b> | <b>91.88</b> | <b>74.86</b> | <b>59.90</b> | <b>46.90</b> | <b>27.90</b> |
| ViT-S/16 | CLIP           | 96.09        | 81.39        | 68.49        | 55.19        | 29.06        | 96.66        | 84.35        | 71.53        | 58.56        | 33.85        |
|          | Random         | 93.62        | 73.37        | 63.02        | 49.96        | 20.62        | 94.90        | 79.91        | 67.90        | 54.10        | 26.24        |
|          | SemDeDup [1]   | 93.21        | 73.85        | 62.34        | 49.40        | 22.54        | 94.00        | 77.01        | 64.45        | 51.40        | 25.51        |
|          | D-Pruning [3]  | 93.28        | 73.09        | 61.67        | 48.99        | 22.48        | 93.41        | 75.43        | 63.42        | 50.77        | 24.41        |
|          | Info-Batch [2] | 95.26        | <b>80.46</b> | <b>67.76</b> | 53.49        | 27.11        | 96.03        | 82.11        | 68.78        | 55.78        | 29.59        |
|          | SCAN           | <b>95.31</b> | 80.00        | 67.04        | <b>53.75</b> | <b>27.41</b> | <b>96.37</b> | <b>82.71</b> | <b>70.32</b> | <b>57.17</b> | <b>31.89</b> |
| ViT-B/32 | CLIP           | 94.36        | 77.84        | 58.43        | 45.79        | 25.50        | 95.65        | 81.62        | 63.40        | 50.33        | 31.28        |
|          | Random         | 90.05        | 69.26        | 50.23        | 40.54        | 18.03        | 90.13        | 69.98        | 51.99        | 41.01        | 20.08        |
|          | SemDeDup [1]   | 90.44        | 69.86        | 50.89        | 38.15        | 19.89        | 90.77        | 70.00        | 51.19        | 39.80        | 20.91        |
|          | D-Pruning [3]  | 90.06        | 69.08        | 50.04        | 37.87        | 19.11        | 90.07        | 69.65        | 51.23        | 37.99        | 20.43        |
|          | Info-Batch [2] | 93.54        | 75.49        | <b>56.98</b> | 44.03        | 24.08        | -            | -            | -            | -            | -            |
|          | SCAN           | <b>94.00</b> | <b>76.91</b> | 56.72        | <b>44.12</b> | <b>24.21</b> | <b>95.05</b> | <b>81.21</b> | <b>61.96</b> | <b>48.42</b> | <b>29.53</b> |
| ViT-B/16 | CLIP           | 96.27        | 82.74        | 70.87        | 57.77        | 29.82        | 96.77        | 84.48        | 72.37        | 59.07        | 33.24        |
|          | Random         | 91.60        | 73.61        | 50.59        | 40.52        | 21.72        | 94.56        | 76.67        | 67.57        | 54.40        | 27.10        |
|          | SemDeDup [1]   | 94.16        | 76.34        | 66.60        | 53.13        | 25.60        | 94.17        | 76.66        | 67.10        | 53.39        | 27.11        |
|          | D-Pruning [3]  | 93.48        | 75.41        | 65.90        | 52.69        | 24.57        | 93.88        | 75.99        | 65.98        | 53.00        | 26.05        |
|          | Info-Batch [2] | 96.10        | 81.06        | <b>70.30</b> | 56.10        | 28.48        | 96.12        | 81.78        | 71.34        | 56.25        | 31.12        |
|          | SCAN           | <b>96.16</b> | <b>81.10</b> | 69.55        | <b>56.48</b> | <b>28.76</b> | <b>96.12</b> | <b>83.97</b> | <b>71.82</b> | <b>58.31</b> | <b>32.48</b> |

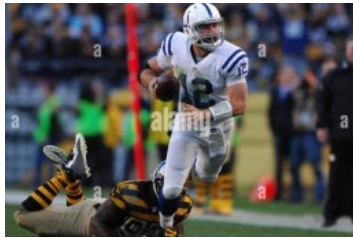

**Text:** during sports team vs game

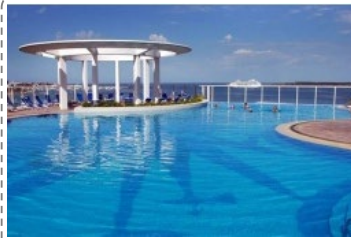

**Text:** look out onto the blue waters while taking a dip in pool

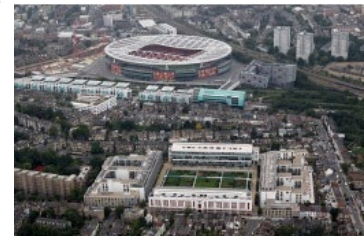

**Text:** an aerial view of home

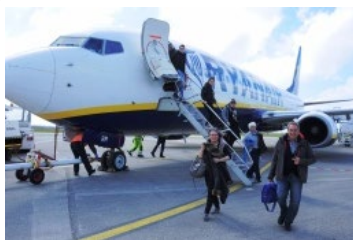

**Text:** the first passengers disembark the flight

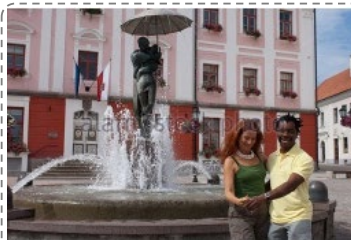

**Text:** a fountain of an embracing young couple under an umbrella

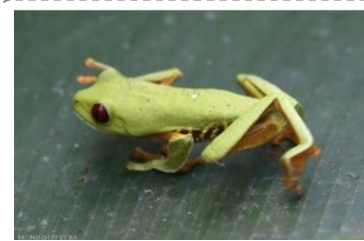

**Text:** biological species crawling on a banana leaf

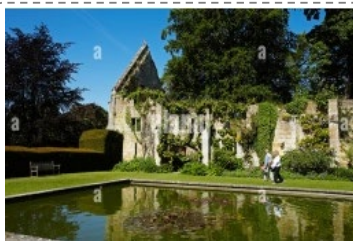

**Text:** the fish pond and remains in the grounds

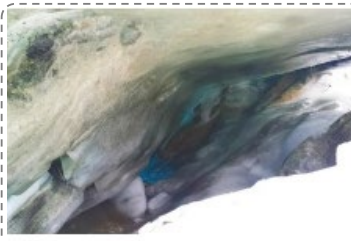

**Text:** magic blue glow under the glacier, photo by person

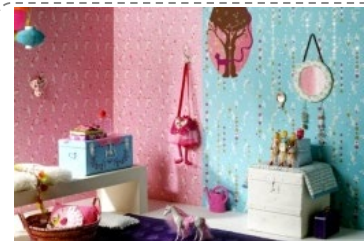

**Text:** select a wallpaper for children's rooms-wall to feel

Figure 2. More *ill-matched* samples obtained by our SCAN approach.

Table 6. Comparison of ViT-B/32 and ViT-B/16 using CLIP and SCAN on CLIP-Benchmark.

| Dataset       | ViT-B/32 |       | ViT-B/16 |       |
|---------------|----------|-------|----------|-------|
|               | CLIP     | SCAN  | CLIP     | SCAN  |
| FER2013       | 18.50    | 22.27 | 18.36    | 20.77 |
| ImageNet-O    | 30.70    | 30.55 | 33.05    | 31.20 |
| ImageNet-R    | 29.23    | 31.91 | 31.08    | 29.67 |
| ImageNetv2    | 20.19    | 21.80 | 21.39    | 20.90 |
| ObjectNet     | 15.13    | 13.93 | 14.84    | 15.03 |
| rendered-sst2 | 50.08    | 49.92 | 51.12    | 50.02 |
| STL-10        | 85.18    | 86.06 | 85.11    | 85.04 |
| SUN397        | 40.55    | 41.02 | 41.95    | 41.29 |
| VOC-2007      | 47.22    | 42.62 | 52.59    | 48.48 |
| Caltech-101   | 64.93    | 68.56 | 65.63    | 65.46 |
| Dmlab         | 20.02    | 11.81 | 17.77    | 16.19 |
| DTD           | 15.66    | 16.44 | 16.24    | 13.83 |
| EuroSat       | 21.92    | 29.81 | 34.20    | 29.67 |
| Flowers       | 18.63    | 24.70 | 20.80    | 20.13 |
| KITTI         | 32.63    | 32.77 | 35.49    | 35.59 |
| PCam          | 50.33    | 52.23 | 50.32    | 52.69 |
| Pet           | 31.28    | 43.06 | 36.41    | 35.84 |
| RESISC45      | 23.41    | 23.05 | 21.28    | 19.38 |
| SVHN          | 16.99    | 06.97 | 09.73    | 07.86 |

Table 7. Performance comparison of RN50 and ViT-B/32 at different thresholds.

| Threshold | RN50  |       | ViT-B/32 |       |
|-----------|-------|-------|----------|-------|
|           | Top-1 | Top-5 | Top-1    | Top-5 |
| 0.1       | 15.80 | 35.21 | 14.75    | 31.58 |
| 0.3       | 16.91 | 35.79 | 16.48    | 33.60 |
| 0.5       | 18.22 | 37.79 | 16.04    | 33.19 |
| 0.7       | 18.20 | 37.78 | 16.48    | 33.23 |
